# Supplementary material
Source: Springer Nature journal article supplement (https://www.springermedizin.de/resource/supplementary/12885_2012_3527_MOESM1_ESM.pdf/9463898)

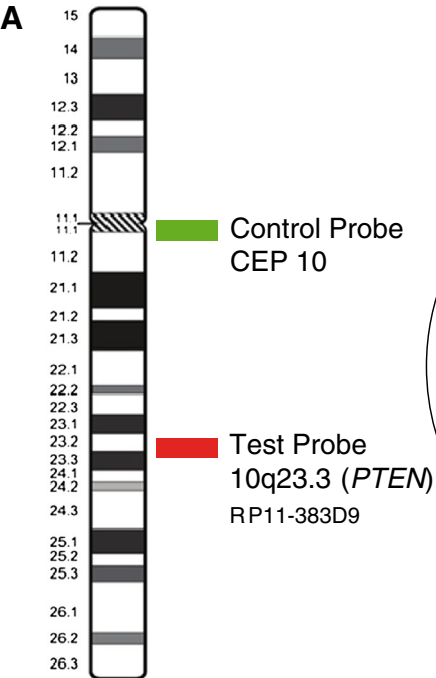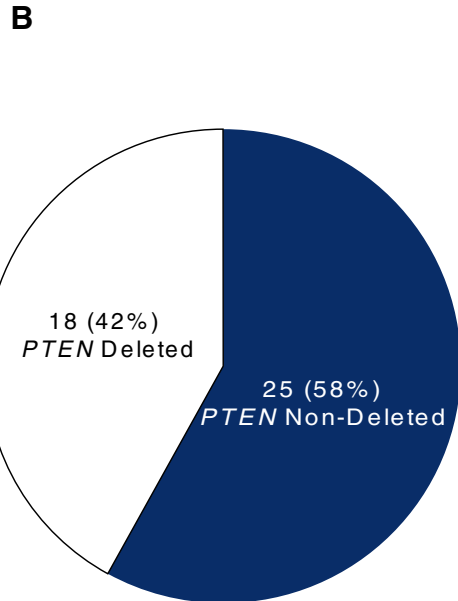

**C** Prostate Cancer, *PTEN* Deleted

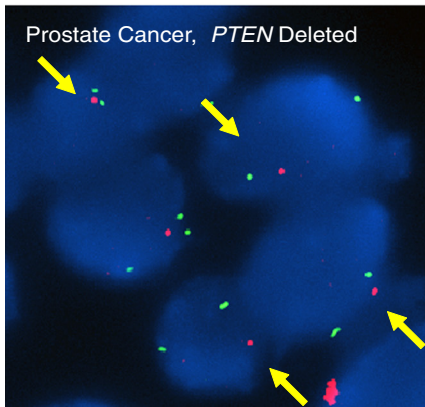

Prostate Cancer, *PTEN* Non-Deleted

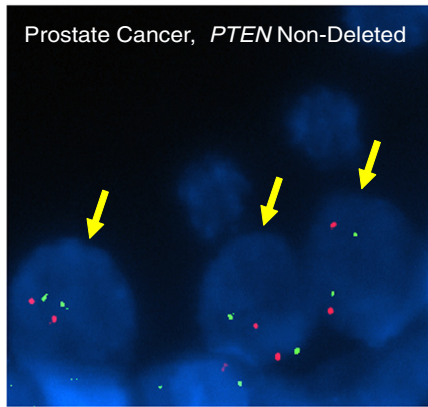

Supplement: MOESM1 [file 9463898]
